# Supplementary material
Source: PubMed Central journal article supplement (PMC6024420)
Supplement: tom-00136-16-s001.pdf [file tom-00136-16-s001.pdf]

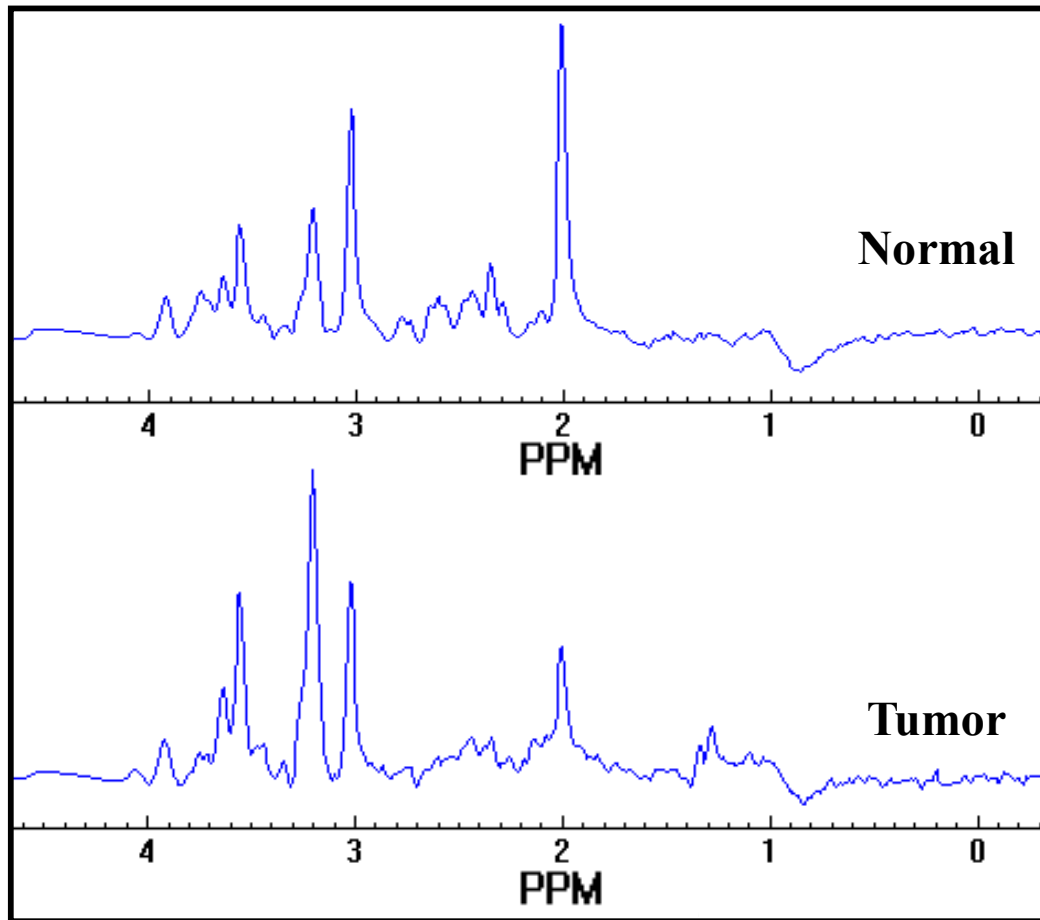

**Supplemental Figure 1.** Representative sMRI spectra from normal and tumor tissue from patient in Figure 3. The spectroscopic technique used gives chemical shift data with SNR of  $\sim 40$ , on average. SNR is calculated as the mean area under the NAA peak divided by the peak-to-peak noise.
