# Supplementary material
Source: PubMed Central journal article supplement (PMC6024420)
Supplement: tom-00136-16-s002.pdf [file tom-00136-16-s002.pdf]

| <b>Patient</b> | <b>Age (years)</b> | <b>Histology</b>       | <b>New or Recurrent</b> | <b>WHO Grade</b> | <b>Location</b>  |
|----------------|--------------------|------------------------|-------------------------|------------------|------------------|
| 1              | 30                 | Anaplastic astrocytoma | New                     | 3                | left frontal     |
| 2              | 34                 | Anaplastic astrocytoma | New                     | 3                | left occipital   |
| 3              | 22                 | Anaplastic astrocytoma | New                     | 3                | left parietal    |
| 4              | 45                 | Anaplastic astrocytoma | Recurrent               | 3                | parietal frontal |
| 5              | 43                 | Anaplastic astrocytoma | Recurrent               | 3                | right parietal   |

**Supplemental Table 1.** Patient and tumor characteristics
